# Supplementary material
Source: PubMed Central journal article supplement (PMC4863468)
Supplement: NIHMS774907-supplement-Supp_Info.pdf [file NIHMS774907-supplement-Supp_Info.pdf]

## Supplementary Information

### **Phosphate Starvation: a Novel Signal that Triggers ESX-5 Secretion in *Mycobacterium tuberculosis***

Sarah R. Elliott<sup>1</sup> and Anna D. Tischler<sup>1,2\*</sup>

<sup>1</sup>Department of Microbiology and Immunology <sup>2</sup>Center for Infectious Diseases and Microbiology Translational Research, University of Minnesota Twin Cities, Minneapolis, MN 55455

\*Contact: Anna D. Tischler, PhD. Email: [tischler@umn.edu](mailto:tischler@umn.edu) Phone: 612-624-9685  
Fax: 612-626-0623

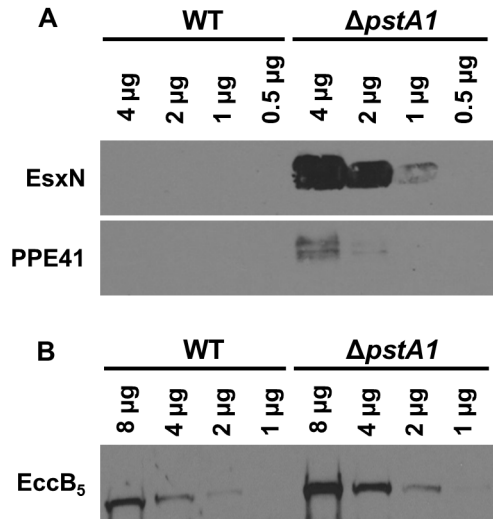

**Figure S1.** Quantification of ESX-5 proteins produced and secreted by the  $\Delta pstA1$  mutant. Proteins were isolated from wild-type *M. tuberculosis* Erdman (WT) or the  $\Delta pstA1$  mutant cultured in Sauton's complete medium without Tween-80 for 5 days. The indicated amounts of culture filtrate (A) or cell lysate (B) were subjected to SDS-PAGE and Western blot analysis. Antibodies used are indicated.

**Supplementary Table 1. Oligonucleotides used for real-time quantitative RT-PCR (qRT-PCR), EMSA probes, and standard RT-PCR.**

| <b>Gene or primer</b>    | <b>F primer sequence (5'-3')</b> | <b>R primer sequence (5'-3')</b> |
|--------------------------|----------------------------------|----------------------------------|
| <i>sigA</i>              | TGCAGTCGGTGCTGGACAC              | CGCGCAGGACCTGTGAGCGG             |
| 16S<br><i>rRNA</i>       | GAGATACTCGAGTGGCGAAC             | GGCCGGCTACCCGTCGTC               |
| <i>esxM</i>              | GGCGGGCCGTTTTGAG                 | CGCGGACGCCCACAT                  |
| <i>esxN</i>              | TCAGGCCATCGTTCGTGAT              | TGGAAGTTACGGCCCAACTG             |
| <i>espG</i> <sub>5</sub> | CGTTGCGCCTGAGTTACGTT             | CTCGTTTAGCCAGTCATTGGAA           |
| <i>eccD</i> <sub>5</sub> | CCAACGCCCCAGTTTCG                | AGCCTCACCGAGCTCTCTGA             |
| <i>mycP</i> <sub>5</sub> | CGTGCATGCTGCCAACAT               | GTGCACGCTGGTCGATGA               |
| <i>ppe41</i>             | GGTCCAGTGGTGATGCAGTT             | CACACAGAGGTCGGTCAGC              |
| <i>eccB</i> <sub>5</sub> | TGACGCCGGAGCAGGTTA               | GGCAAAGCGTCGAACAATG              |
| <i>modD</i>              | CGGTTGGAGGATTCAGCTT              | GTGCTGAACCGTAGTCGAAGT            |
| <i>espA</i>              | GGCGCCAAGAAAGGTCTC               | CCGGGATGTAGGTCAGGTC              |
| <i>esxB</i>              | GGCAGAGATGAAGACCGATG             | ACCTGGTGCATCTGGGTTT              |
| <i>ppe27-pe19 Ig1</i>    | CGCTGTTACTGTGGCGTTACC            | CCCGTTTCGCAAGTGTTTAC             |
| <i>ppe27-pe19 Ig3</i>    | CGGGTGGCATCGAAATCA               | GCAACGGCTCTCTGCAAGA              |
| <i>ppe27-pe19 Ig4</i>    | TCTTGCAGAGAGCCGTTGCT             | CGGCTGTGTGGTCACGAA               |
| <i>pe19</i>              | GGCGAACTACAGGGTATTGG             | GCACTACTCCGGTGGTTGGA             |
| <i>dnaN</i>              | TTTTCTGCGGGTGCCGATGATG           | TTCCGAGCGCAACGAACTCAA            |
| <i>esxNR3</i>            |                                  | TGGAAGTTACGGCCCAACTG             |
| <i>espG5R1</i>           |                                  | TCATACTCTGCTGTGTGTTTTCCACT       |
